# Supplementary material for: Cre/lox regulated conditional rescue and inactivation with zebrafish UFlip alleles generated by CRISPR-Cas9 targeted integration
Source: eLife. 2022 Jun 17;11:e71478. doi: 10.7554/eLife.71478 (PMC9270027; doi:10.7554/eLife.71478)
Supplement: Figure 4—figure supplement 1—source data 1. [file elife-71478-fig4-figsupp1-data1.xlsx]

## Sheet: Sheet1
Figure 4- figure supplement 1 A source data
Quantification of activated caspase-3 positive cells in rbbp4∆4/+ , rbbp4off/∆4 and rbbp4∆4/∆4 2dpf larval midbrain and retina
		# of activated caspase-3 positive cells
	individual 2 dpf larvae	rbbp4∆4/+			rbbp4off/∆4			rbbp4∆4/∆4			rbbp4off/∆4 vs. rbbp4∆4/∆4
		midbrain	retina		midbrain	retina		midbrain	retina		midbrain	retina
	1#	1	0		46	201		40	178
	2#	1	2		62	134		55	215
	3#	1	3		76	206		80	152
					77	240		67	191
t test					0.00223785	0.00153685		0.00796193	0.00059912		0.686512	0.677775
					**	**					n.s.	n.s.
