# Supplementary material for: Cre/lox regulated conditional rescue and inactivation with zebrafish UFlip alleles generated by CRISPR-Cas9 targeted integration
Source: eLife. 2022 Jun 17;11:e71478. doi: 10.7554/eLife.71478 (PMC9270027; doi:10.7554/eLife.71478)
Supplement: Figure 4—source data 1. [file elife-71478-fig4-data1.xlsx]

## Sheet: rbbp4-off incross
Figure 4 B - rbbp4off/+ incross RT-qPCR source data
		rbbp4 ex4-ex5		average	rps6kb1b		average	Delta CT	2^-ΔCT	average	2^-ΔΔ CT	Percentage
	+/+ rep1	21.7233	21.6279	21.6756	22.3259	22.3187	22.3223	-0.646697	1.56558		1.08351	108.351
	+/+ rep2	21.738	21.7887	21.7634	22.3199	22.3677	22.3438	-0.580446	1.49531	1.44491	1.03488	103.488	100
	+/+ rep3	21.9235	21.6851	21.8043	22.0187	22.2884	22.1535	-0.349186	1.27384		0.881605	88.1605
	rbbp4off/+ rep1	22.6123	22.2618	22.4371	22.1165	22.1847	22.1506	0.286455	0.819914		0.56745	56.745
	rbbp4off/+ rep2	22.3425	22.2935	22.318	22.422	22.5328	22.4774	-0.159456	1.11687	0.979385	0.772965	77.2965	67.7817
	rbbp4off/+ rep3	22.1287	22.0017	22.0652	22.0946	22.0397	22.0672	-0.00198167	1.00137		0.693035	69.3035
	ttest											0.0194981
	rbbp4off/off rep1	35.2069	35.9739	35.5904	21.4064	21.3892	21.3978	14.1926	5.3408e-05		3.69628e-05	0.00369628
	rbbp4off/off rep2	34.7009	34.4681	34.5845	22.1178	22.1118	22.1148	12.4697	0.000176294	0.000102529	0.00012201	0.012201	0.00709584
	rbbp4off/off rep3	34.3933	36.7132	35.5533	21.9049		21.9049	13.6483	7.7884e-05		5.39023e-05	0.00539023
	ttest											8.02353e-05
		rbbp4 ex11-ex12		average	rps6kb1b		average	Delta CT	2^-ΔCT	average	2^-ΔΔ CT	Percentage
	+/+ rep1	20.9376	21.1372	21.0374	22.3259	22.3187	22.3223	-1.28488	2.43662		1.05385	105.385
	+/+ rep2	21.1578	21.2165	21.1872	22.3199	22.3677	22.3438	-1.15666	2.2294	2.3121	0.964232	96.4232	100
	+/+ rep3	21.0018	20.9395	20.9706	22.0187	22.2884	22.1535	-1.18287	2.27028		0.981913	98.1913
	rbbp4off/+ rep1	21.7752	21.8806	21.8279	22.1165	22.1847	22.1506	-0.322689	1.25066		0.540919	54.0919
	rbbp4off/+ rep2	21.9253	22.0257	21.9755	22.422	22.5328	22.4774	-0.501942	1.41612	1.32515	0.612482	61.2482	57.3135
	rbbp4off/+ rep3	21.6414	21.7167	21.6791	22.0946	22.0397	22.0672	-0.388091	1.30866		0.566005	56.6005
	ttest											0.000245382
	rbbp4off/off rep1	26.8304	26.8966	26.8635	21.4064	21.3892	21.3978	5.46571	0.0226286		0.00978705	0.978705
	rbbp4off/off rep2	27.2964	27.276	27.2862	22.1178	22.1118	22.1148	5.17142	0.027749	0.0260725	0.0120017	1.20017	1.12766
	rbbp4off/off rep3	27.1469	26.9964	27.0716	21.9049		21.9049	5.1667	0.0278399		0.012041	1.2041
	ttest											3.52941e-06

## Sheet: rbbp4-on incross
Figure 4 J - rbbp4on/+ incross RT-qPCR source data
		rbbp4 ex4-ex5		average	rps6kb1b		average	Delta CT	2^-ΔCT	average	2^-ΔΔ CT	Percentage
	+/+ rep1	22.0215	22.1814	22.1014	23.6039	23.8691	23.7365	-1.63507	3.10603		0.961514	96.1514
	+/+ rep2	22.0488	21.8111	21.9299	23.2699	23.4688	23.3694	-1.43943	2.71213	3.23035	0.839578	83.9578	100
	+/+ rep3	21.2908	21.2043	21.2476	23.0694	23.3325	23.201	-1.95341	3.87289		1.19891	119.891
	rbbp4on/+ rep1	22.1135	22.0294	22.0714	23.3097	23.4641	23.3869	-1.31549	2.48886		0.770462	77.0462
	rbbp4on/+ rep2	22.2873	22.0792	22.1832	23.3561	23.4623	23.4092	-1.22595	2.3391	2.55201	0.724101	72.4101	79.001
	rbbp4on/+ rep3	22.0757	22.2188	22.1472	23.5717	23.7224	23.6471	-1.49981	2.82806		0.875466	87.5466
	ttest											0.140858
	rbbp4on/on rep1	22.3807	22.3901	22.3854	22.9215	23.3096	23.1155	-0.730113	1.65877		0.513495	51.3495
	rbbp4on/on rep2	22.656	22.8447	22.7504	23.6238	23.6216	23.6227	-0.872316	1.8306	1.85033	0.566688	56.6688	57.2794
	rbbp4on/on rep3	22.404	22.4194	22.4117	23.4083	23.5026	23.4555	-1.04377	2.06161		0.6382	63.82
	ttest											0.0186028
		rbbp4 ex11-ex12		average	rps6kb1b		average	Delta CT	2^-ΔCT	average	2^-ΔΔ CT	Percentage
	+/+ rep1	22.2476	22.0411	22.1444	23.6039	23.8691	23.7365	-1.59214	3.01496		0.958251	95.8251
	+/+ rep2	21.5912	21.7374	21.6643	23.2699	23.4688	23.3694	-1.70509	3.2605	3.14632	1.03629	103.629	100
	+/+ rep3	21.3449	21.734	21.5394	23.0694	23.3325	23.201	-1.66152	3.1635		1.00546	100.546
	rbbp4on/+ rep1	22.1126	22.0835	22.0981	23.3097	23.4641	23.3869	-1.28886	2.44335		0.776573	77.6573
	rbbp4on/+ rep2	22.0881	22.333	22.2106	23.3561	23.4623	23.4092	-1.19865	2.29524	2.33949	0.729501	72.9501	74.3562
	rbbp4on/+ rep3	22.4122	22.504	22.4581	23.5717	23.7224	23.6471	-1.18895	2.27986		0.724612	72.4612
	ttest											0.000799498
	rbbp4on/on rep1	22.3586	22.4812	22.4199	22.9215	23.3096	23.1155	-0.695614	1.61957		0.514752	51.4752
	rbbp4on/on rep2	22.6428	22.8535	22.7482	23.6238	23.6216	23.6227	-0.874534	1.83342	1.79168	0.582717	58.2717	56.9452
	rbbp4on/on rep3	22.4408	22.5848	22.5128	23.4083	23.5026	23.4555	-0.942642	1.92205		0.610887	61.0887
	ttest											0.000294246
