# Supplementary material for: Cre/lox regulated conditional rescue and inactivation with zebrafish UFlip alleles generated by CRISPR-Cas9 targeted integration
Source: eLife. 2022 Jun 17;11:e71478. doi: 10.7554/eLife.71478 (PMC9270027; doi:10.7554/eLife.71478)
Supplement: Figure 5—figure supplement 2—source data 1. [file elife-71478-fig5-figsupp2-data1.xlsx]

## Sheet: Sheet1
Figure 5 supplement figure 1 source data
Figure 5 supplement figure 1 A
		5' junction			average	rps6kb1b		average	Delta CT	2^-ΔCT	average	2^-ΔΔ CT	Percentage
	rep1	26.4732	26.6363	26.3503	26.4866	22.3437	22.179	22.2614	4.22522	0.0534664		0.963505	96.3505
rbbp4off/Δ4	rep2	26.8871	26.5911	26.363	26.6137	22.4611	22.6038	22.5325	4.08121	0.059079	0.0554915	1.06465	106.465	100
	rep3	26.8974	26.7448	26.4313	26.6912	22.4862	22.4705	22.4784	4.21279	0.0539292		0.971846	97.1846
	rep1	27.3203	26.9544	27.0016	27.0921	22.5031		22.5031	4.58899	0.0415504		0.74877	74.877
ascl1b-2A-Cre; rbbp4off/Δ4	rep2	28.1688	27.4098	27.7052	27.7613	23.0995		23.0995	4.66176	0.0395066	0.0360313	0.711939	71.1939	64.9312
	rep3	27.8679	28.3573	27.6478	27.9577	22.7487		22.7487	5.20893	0.0270369		0.487226	48.7226
													0.0162884	t-test
													*
		3' junction			average	rps6kb1b		average	Delta CT	2^-ΔCT	average	2^-ΔΔ CT	Percentage
	rep1	23.9555	24.0742	23.7256	23.9185	22.3437	22.179	22.2614	1.65708	0.317079		0.898458	89.8458
rbbp4off/Δ4	rep2	24.0145	24.121	23.678	23.9378	22.4611	22.6038	22.5325	1.40534	0.37753	0.352915	1.06975	106.975	100
	rep3	23.8029	24.0795	23.9251	23.9358	22.4862	22.4705	22.4784	1.45745	0.364136		1.03179	103.179
	rep1	24.2402	24.3233	24.1782	24.2472	22.5031		22.5031	1.74411	0.298518		0.845863	84.5863
ascl1b-2A-Cre; rbbp4off/Δ4	rep2	24.9913	25.1271	25.2096	25.1093	23.0995		23.0995	2.00983	0.248302	0.237033	0.703575	70.3575	67.1642
	rep3	24.7473	25.6438	25.6725	25.3545	22.7487		22.7487	2.60579	0.164278		0.465488	46.5488
													0.0276097	t-test
													*
Figure 5 supplement figure 1 B
		5' junction		average	rps6kb1b		average	Delta CT	2^-ΔCT	average	2^-ΔΔ CT	Percentage
	rep1	25.2197	25.0886	25.1542	21.4645	21.5507	21.5076	3.6466	0.079848		1.13276	113.276
rbbp4off/Δ4	rep2	25.2567	25.1015	25.1791	21.3907	21.1391	21.2649	3.91418	0.0663306	0.07049	0.940993	94.0993	100
	rep3	25.9173	25.8821	25.8997	21.9625	21.963	21.9628	3.93696	0.0652915		0.926252	92.6252
	rep1	26.2104	26.0778	26.1441	21.639	21.5617	21.6004	4.5437	0.0428756		0.60825	60.825
neurod1-2A-Cre; rbbp4off/Δ4	rep2	25.6059	25.7457	25.6758	21.2806	21.2795	21.2801	4.39576	0.0475054	0.0456965	0.673931	67.3931	64.8268
	rep3	25.841	25.5946	25.7178	21.3544	21.2408	21.2976	4.42017	0.0467084		0.662624	66.2624
												0.00718884	t-test
												**
		3' junction		average	rps6kb1b		average	Delta CT	2^-ΔCT	average	2^-ΔΔ CT	Percentage
	rep1	22.6179	23.1381	22.878	21.4645	21.5507	21.5076	1.37044	0.386772		1.25232	125.232
rbbp4off/Δ4	rep2	23.0414	23.1717	23.1065	21.3907	21.1391	21.2649	1.84162	0.279009	0.308845	0.903393	90.3393	100
	rep3	23.8808	23.9233	23.902	21.9625	21.963	21.9628	1.93923	0.260755		0.844289	84.4289
	rep1	25.7875	25.6252	25.7064	23.4408	23.2959	23.3683	2.33803	0.197781		0.640387	64.0387
neurod1-2A-Cre; rbbp4off/Δ4	rep2	25.4929	25.46	25.4765	23.2671	23.2195	23.2433	2.23315	0.212694	0.206198	0.688674	68.8674	66.7641
	rep3	25.3936	25.3556	25.3746	23.2051	23.015	23.1101	2.26452	0.208119		0.673863	67.3863
												0.0302014	t-test
												*
