# Supplementary material for: Cre/lox regulated conditional rescue and inactivation with zebrafish UFlip alleles generated by CRISPR-Cas9 targeted integration
Source: eLife. 2022 Jun 17;11:e71478. doi: 10.7554/eLife.71478 (PMC9270027; doi:10.7554/eLife.71478)
Supplement: Figure 5—source data 1. [file elife-71478-fig5-data1.xlsx]

## Sheet: Sheet1
Figure 5 - Source data
Figure 5 F
Quantification of activated caspase-3 positive cells in rbbp4off/D4 and Cre injected rbbp4off/D4 2 dpf larval midbrain and retina
			# of activated caspase-3 positive cells
		individual 2dpf larvae	rbbp4off/D4			Cre injected rbbp4off/D4
			midbrain	retina		midbrain	retina
		1#	95	258		18	25
		2#	70	223		3	4
		3#	108	260		3	4
t-test						0.00245391	7.06533e-05
						**	****
Figure 5 G
rbbp4off/D4 Cre injected 5' and 3' junction qPCR
			5'jx		average	rps6kb1b		average	Delta CT	2^-ΔCT	average	2^-ΔΔ CT	Percentage
		rep1	24.2021	24.1521	24.1771	22.1677	22.0793	22.1235	2.05364	0.240876		1.03519	103.519
	rbbp4off/D4	rep2	24.3139	24.4736	24.3937	22.4778	22.4011	22.4395	1.95424	0.258057	0.232688	1.10902	110.902	100
		rep3	25.2503	25.0533	25.1518	22.8632	22.784	22.8236	2.3282	0.199132		0.85579	85.579
		rep1	31.2334	31.044	31.1387	22.4419	22.3409	22.3914	8.74729	0.00232703		0.0100006	1.00006
	rbbp4off/D4 Cre injected	rep2	30.2459	29.7444	29.9951	22.2209	22.235	22.2279	7.76722	0.00459022	0.0153449	0.0197269	1.97269	6.59462
		rep3	27.8241	27.6029	27.7135	23.1039	22.971	23.0375	4.67604	0.0391175		0.168111	16.8111
													0.000506753	t-test
													***
			3'jx		average	rps6kb1b		average	Delta CT	2^-ΔCT	average	2^-ΔΔ CT	Percentage
		rep1	22.6179	23.1381	22.878	22.1677	22.0793	22.1235	0.75452	0.592744		1.04843	104.843
	rbbp4off/D4	rep2	23.0414	23.1717	23.1065	22.4778	22.4011	22.4395	0.667024	0.629804	0.565364	1.11398	111.398	100
		rep3	23.8808	23.9233	23.902	22.8632	22.784	22.8236	1.07843	0.473545		0.837593	83.7593
		rep1	29.0274	28.7924	28.9099	22.4419	22.3409	22.3914	6.51845	0.0109082		0.019294	1.9294
	rbbp4off/D4 Cre injected	rep2	28.2512	28.3965	28.3238	22.2209	22.235	22.2279	6.0959	0.0146201	0.0394536	0.0258596	2.58596	6.97844
		rep3	26.4857	26.4476	26.4667	23.1039	22.971	23.0375	3.42922	0.0928326		0.1642	16.42
													0.000630645	t-test
													***
Figure 5 K
Quantification of activated caspase-3 positive cells in rbbp4off/∆4, ascl1b-2A-Cre; rbbp4off/∆4 and neruod1-2A-Cre; rbbp4off/∆4 2 dpf larval midbrain and retina
		# of activated caspase-3 positive cells
	individual 2 dpf larvae	rbbp4off/∆4			ascl1b-2A-Cre; rbbp4off/∆4			neurod12A-Cre; rbbp4off/∆4
		midbrain	retina		midbrain	retina		midbrain	retina
	1#	104	182		86	93		43	139
	2#	72.5	197		73	151		85	179
	3#	81	90		54	192		110	160
	t-test				0.324759	0.815253		0.779392	0.936512
