# Supplementary material for: Cre/lox regulated conditional rescue and inactivation with zebrafish UFlip alleles generated by CRISPR-Cas9 targeted integration
Source: eLife. 2022 Jun 17;11:e71478. doi: 10.7554/eLife.71478 (PMC9270027; doi:10.7554/eLife.71478)
Supplement: Figure 6—figure supplement 2—source data 1. [file elife-71478-fig6-figsupp2-data1.xlsx]

## Sheet: Sheet1
Figure 6 - figure supplement 1 - Source data
Figure 4 - figure supplement 1 D
ascl1b-2A-Cre; rbbp4on/Δ4 inversion 5' and 3' junction qPCR
		5' junction		average	rps6kb1b		average	Delat CT	2^-ΔCT	average	2^-ΔΔ CT	Percentage
	rep1	23.3799	23.4752	23.4275	21.9082	21.9257	21.917	1.51058	0.35097		0.993568	99.3568
rbbp4on/Δ4	rep2	23.907	23.7254	23.8162	22.3782	22.3629	22.3706	1.4456	0.367139	0.353242	1.03934	103.934	100
	rep3	23.9857	23.7423	23.864	22.4224	22.2065	22.3144	1.54955	0.341617		0.967091	96.7091
	rep1	24.0817	23.9967	24.0392	22.1935	22.1834	22.1884	1.8508	0.277238		0.784838	78.4838
ascl1b-2A-Cre; rbbp4on/Δ4	rep2	23.8151	23.6778	23.7465	21.9765	22.0099	21.9932	1.75328	0.296627	0.297118	0.839728	83.9728	84.1117
	rep3	23.838	23.7083	23.7732	22.1418	22.0941	22.118	1.65523	0.317488		0.898784	89.8784
												0.0152875	t-test
												*
		3' junction		average	rps6kb1b		average	Delat CT	2^-ΔCT	average	2^-ΔΔ CT	Percentage
	rep1	23.2314	23.2691	23.2503	21.8535	21.9286	21.8911	1.35918	0.389804		0.991366	99.1366
rbbp4on/Δ4	rep2	23.5382	23.6541	23.5961	22.2132	22.2537	22.2334	1.36274	0.388842	0.393198	0.988921	98.8921	100
	rep3	23.6524	23.6697	23.661	22.4337	22.2513	22.3425	1.31851	0.400949		1.01971	101.971
	rep1	24.0511	23.9719	24.0115	22.3815	22.2576	22.3195	1.69197	0.309504		0.787144	78.7144
ascl1b-2A-Cre; rbbp4on/Δ4	rep2	23.6726	23.5037	23.5882	22.0304	22.0358	22.0331	1.55508	0.34031	0.317591	0.865492	86.5492	80.7713
	rep3	24.1827	24.0591	24.1209	22.3838	22.4124	22.3981	1.7228	0.30296		0.770503	77.0503
												0.00339881	t-test
												**
Figure 6 - figure supplement 1 E
rbbp4-on ; neurod1-2A-Cre inversion 5' and 3' junction qPCR
		5' junction		average	rps6kb1b		average	Delat CT	2^-ΔCT	average	2^-ΔΔ CT	Percentage
	rep1	24.1743	24.2883	24.2313	22.7702	22.8527	22.8114	1.41988	0.373743		0.965429	96.5429
rbbp4on/Δ4	rep2	24.3118	24.2503	24.281	22.9961	22.9282	22.9622	1.31889	0.400844	0.387126	1.03543	103.543	100
	rep3	24.0949	24.1088	24.1018	22.8346	22.6283	22.7315	1.37037	0.386792		0.999136	99.9136
	rep1	24.603	24.4849	24.5439	23.045	23.0255	23.0353	1.50866	0.351436		0.907808	90.7808
neurod1-2A-Cre; rbbp4on/Δ4	rep2	24.2781	24.2173	24.2477	22.5862	22.6064	22.5963	1.65141	0.318328	0.325048	0.822284	82.2284	83.9642
	rep3	24.3829	24.2081	24.2955	22.5595	22.6088	22.5842	1.71133	0.305379		0.788834	78.8834
												0.0170781	t-test
												*
		3' junction		average	rps6kb1b		average	Delat CT	2^-ΔCT	average	2^-ΔΔ CT	Percentage
	rep1	25.8382	25.9407	25.8894	22.7702	22.8527	22.8114	3.078	0.118421		1.06299	106.299
rbbp4on/Δ4	rep2	26.222	26.1549	26.1885	22.9961	22.9282	22.9622	3.22629	0.106854	0.111404	0.959153	95.9153	100
	rep3	25.825	26.0347	25.9299	22.8346	22.6283	22.7315	3.19843	0.108937		0.977857	97.7857
	rep1	26.3594	26.5875	26.4734	23.045	23.0255	23.0353	3.43819	0.0922578		0.828137	82.8137
neurod1-2A-Cre; rbbp4on/Δ4	rep2	26.2726	25.8321	26.0523	22.5862	22.6064	22.5963	3.45603	0.0911238	0.0924365	0.817957	81.7957	82.9741
	rep3	26.0801	25.9128	25.9965	22.5595	22.6088	22.5842	3.4123	0.093928		0.843129	84.3129
												0.00654323	t-test
												*
