# Supplementary material for: Cre/lox regulated conditional rescue and inactivation with zebrafish UFlip alleles generated by CRISPR-Cas9 targeted integration
Source: eLife. 2022 Jun 17;11:e71478. doi: 10.7554/eLife.71478 (PMC9270027; doi:10.7554/eLife.71478)
Supplement: Figure 6—source data 1. [file elife-71478-fig6-data1.xlsx]

## Sheet: Sheet1
Figure 6 Source data
Figure 4 F
Quantification of activated caspase-3 positive cells in rbbp4on/∆4 and Cre injected rbbp4on/∆4 2 dpf larval midbrain and retina
		# of activated caspase-3 positive cells
	individual 2dpf larvae	rbbp4on/∆4			Cre injected rbbp4on/∆4
		midbrain	retina		midbrain	retina
	1#	1	1		105	102
	2#	0	2		54	205
	3#	3	1		32	79
t-test					0.0449825	0.0303076
					*	*
Figure 6 G
rbbp4on/Δ4 Cre inversion 5' and 3' junction qPCR
		5'jx		average	rps6kb1b		average	Delta CT	2^-ΔCT	average	2^-ΔΔ CT	Percentage	average
	rep1	22.2443	22.2197	22.232	21.5803	21.5714	21.5759	0.656111	0.634586		0.937851	93.7851
rbbp4on/Δ4	rep2	22.3343	22.3809	22.3576	21.9565	22.0001	21.9783	0.379305	0.768808	0.676639	1.13622	113.622	100
	rep3	22.1828	22.1514	22.1671	21.5879	21.3972	21.4925	0.674559	0.626524		0.925934	92.5934
	rep1	25.5253	25.3431	25.4342	21.7609	21.6868	21.7238	3.71031	0.0763987		0.112909	11.2909
rbbp4on/Δ4 Cre injected	rep2	25.0256	24.9064	24.966	21.7824	21.7403	21.7613	3.20469	0.108466	0.092899	0.160301	16.0301	13.7295
	rep3	25.2615	25.0619	25.1617	21.7504	21.7455	21.7479	3.41377	0.0938327		0.138675	13.8675
												0.000242919	t-test
												***
		3'jx		average	rps6kb1b		average	Delta CT	2^-ΔCT	average	2^-ΔΔ CT	Percentage
	rep1	23.6113	23.5793	23.5953	21.5803	21.5714	21.5759	2.01941	0.246658		0.913853	91.3853
rbbp4on/Δ4	rep2	23.5641	23.5491	23.5566	21.9565	22.0001	21.9783	1.57829	0.334879	0.26991	1.2407	124.07	100
	rep3	23.642	23.6065	23.6242	21.5879	21.3972	21.4925	2.13167	0.228194		0.845444	84.5444
	rep1	26.3054	26.0192	26.1623	21.7609	21.6868	21.7238	4.43842	0.0461214		0.170877	17.0877
rbbp4on/Δ4 Cre injected	rep2	26.133	25.9603	26.0467	21.7824	21.7403	21.7613	4.28535	0.0512839	0.0479749	0.190003	19.0003	17.7744
	rep3	26.2047	26.1432	26.1739	21.7504	21.7455	21.7479	4.42603	0.0465193		0.172351	17.2351
												0.00253455	t-test
												**
Figure 6 L
Quantification of activated caspase-3 positive cells in ascl1b-2A-Cre; rbbp4∆4/+ and ascl1b-2A-Cr; rbbp4on/∆4 2 dpf larval midbrain and retina
		# of activated caspase-3 positive cells
	individual 2 dpf larvae	ascl1b-2A-Cre; rbbp4∆4/+			ascl1b-2A-Cre; rbbp4on/∆4
		midbrain	retina		midbrain	retina
	1#	3.33333	1		44.3333	0
	2#	4.66667	0		26.3333	0
	3#	4	3		43.6667	3
	4#	4	0		60.3333	2
	5#				20.3333	0
	6#				27	0
	t-test				0.00264471	0.854331
					**	n.s.
Fig 6 M
Quantification of activated caspase-3 positive cells in neurod1-2A-Cre; rbbp4∆4/+ and neurod1-2A-Cre; rbbp4on/∆4 2dpf larval midbrain and retina
		# of activated caspase-3 positive cells
	individual 2 dpf larvae	neurod1-2A-Cre; rbbp4∆4/+			neurod1-2A-Cre; rbbp4on/∆4
		midbrain	retina		midbrain	retina
	1#	1	0		1	1
	2#	0	2		0	1
	3#	2	1		0	0
	t-test				0.373901	0.64333
					n.s.	n.s.
