# Supplementary material for: Cre/lox regulated conditional rescue and inactivation with zebrafish UFlip alleles generated by CRISPR-Cas9 targeted integration
Source: eLife. 2022 Jun 17;11:e71478. doi: 10.7554/eLife.71478 (PMC9270027; doi:10.7554/eLife.71478)
Supplement: Figure 7—figure supplement 1—source data 1. [file elife-71478-fig7-figsupp1-data1.xlsx]

## Sheet: Sheet1
Figure 7 - figure suppplement 1 - Source data
	Quantification of pH3 labeled cells				p value 1 way anova comparison to +/+ midbrain or retina
wild type +/+ 5 dpf	Sect1	Sect2	Sect3
Retina
Embry1	5	2	1	8
Embry2	3	2	2	7
Embry3	1	4	5	10
Avg				8.33333
Brain
Embry1	7	1	2	10
Embry2	7	3	3	13
Embry3	1	2	3	6
Avg				9.66667
	Quantification of pH3 labeled cells
rb1stop/+ 5dpf	Sect1	Sect2	Sect3	Total
Retina
Embry1	10	5	7	22
Embry2	8	8	8	24
Embry3	6	5	6	17
Avg				21	ns 0.9565
Brain
Embry1	9	16	12	37
Embry2	6	5	10	21
Embry3	9	5	8	22
Avg				26.6667	ns 0.6797
	Quantification of pH3 labeled cells
rb1stop/stop 5dpf	Sect1	Sect2	Sect3	Total
Retina
Embry1	141	136	142	419
Embry2	134	128	142	404
Embry3	109	99	110	318		rb1stop/stop vs. rb1∆7/∆7
Avg				380.333	**** <0.0001	ns 0.2951
Brain
Embry1	43	48	51	142
Embry2	57	60	55	172
Embry3	34	45	48	127
Avg				147	**** <0.0001	ns 0.1534
	Quantification of pH3 labeled cells
rb1∆7/∆7 5 dpf	Sect1	Sect2	Sect3	Total
Retina
Embry1	111	118	105	334
Embry2	95	98	109	302
Embry3	121	107	132	360
Avg				332	**** <0.0001
Brain
Embry1	75	69	70	214
Embry2	57	60	53	170
Embry3	54	48	63	165
Avg				183	**** <0.0001
