# Supplementary material for: Cre/lox regulated conditional rescue and inactivation with zebrafish UFlip alleles generated by CRISPR-Cas9 targeted integration
Source: eLife. 2022 Jun 17;11:e71478. doi: 10.7554/eLife.71478 (PMC9270027; doi:10.7554/eLife.71478)
Supplement: Figure 7—figure supplement 2—source data 1. [file elife-71478-fig7-figsupp2-data1.xlsx]

## Sheet: Sheet1
Figure 7 - figure supplement 2 A						Figure 7 - figure supplement 2 B
	pH3 counts:						pH3 counts:
wt +/+ 5dpf						wt +/+ 5dpf
	Sect1	Sect2	Sect3				Sect1	Sect2	Sect3
Retina						Retina
Embryo1	5	2	1	8		Embryo1	5	2	1	8
Embryo2	3	2	2	7		Embryo2	3	2	2	7
Embryo3	1	4	5	10		Embryo3	1	4	5	10
Avg				8.33333		Avg				8.33333
Brain						Brain
Embryo1	7	1	2	10		Embryo1	7	1	2	10
Embryo2	7	3	3	13		Embryo2	7	3	3	13
Embryo3	1	2	3	6		Embryo3	1	2	3	6
Avg				9.66667		Avg				9.66667
rb1off/stop							Sect1	Sect2	Sect3	Total
	Sect1	Sect2	Sect3	Total		rb1on/+
Retina						Retina
Embryo1	127	145	134	406		Embryo1	5	6	4	15
Embryo2	121	147	125	393		Embryo2	6	5	3	14
Embryo3	137	118	126	381		Embryo3	7	3	2	12
Avg				393.333		Avg				13.6667
				7.62088e-07						0.0128867
				****						*
Brain						Brain
Embryo1	42	38	43	123		Embryo1	4	5	3	12
Embryo2	39	35	45	119		Embryo2	7	8	8	23
Embryo3	41	61	56	158		Embryo3	8	5	4	17
Avg				133.333		Avg				17.3333
				0.000595325						0.111839
				***						n.s.
rb1∆7/stop						rb1on/stop
	Sect1	Sect2	Sect3	Total		Retina
Retina						Embryo1	10	13	9	32
Embryo1	108	90	89	287		Embryo2	6	8	12	26
Embryo2	118	112	94	324		Embryo3	8	8	6	22
Embryo3	93	97	101	291		Avg				26.6667
Avg				300.667						0.00379591
				0.0020466						**
						Brain
Brain						Embryo1	9	10	12	31
Embryo1	70	60	69	199		Embryo2	8	11	10	29
Embryo2	62	63	55	180		Embryo3	10	7	9	26
Embryo3	48	53	56	157		Avg				28.6667
Avg				178.667						0.00159479
				0.0656268						**
