# Supplementary material for: Cre/lox regulated conditional rescue and inactivation with zebrafish UFlip alleles generated by CRISPR-Cas9 targeted integration
Source: eLife. 2022 Jun 17;11:e71478. doi: 10.7554/eLife.71478 (PMC9270027; doi:10.7554/eLife.71478)
Supplement: Figure 7—source data 1. [file elife-71478-fig7-data1.xlsx]

## Sheet: rb1-off het incross
Figure 7 - Source data. RT-qPCR of rb1 mRNA levels in progeny from rb1off/+ incross and rb1on/+ incross
Figure 7 B - rb1off/+ incross RT-qPCR source data
Gene		TR1	TR2	Avg	Δct (target-reference)	ΔΔct (target-control)	2^-ΔΔct	percentage
rb1 ex6-ex8	+/+ rep1	25.7571	25.7729	25.765	2.14587	-0.145614	1.1062	110.62
	+/+ rep2	26.119	25.6357	25.8774	2.4371	0.145614	0.903995	90.3995
	+/+ rep3	25.8069	25.4511	25.629	2.04153	0.00153093	0.998939	99.8939
	rb1off/+ rep1	26.5418	26.5999	26.5709	2.98064	0.689152	0.620218	62.0218
	rb1off/+ rep2	26.9082	26.623	26.7656	2.81581	0.524323	0.695286	69.5286
	rb1off/+ rep3	26.6399	26.1396	26.3898	3.08127	1.04127	0.485898	48.5898
	t-test							0.00892621
	rb1off/off rep1	35.4851	35.4751	35.4801	12.3762	10.0847	0.000920896	0.0920896
	rb1off/off rep2	36.2836	35.9508	36.1172	12.6438	10.3523	0.000764962	0.0764962
	rb1off/off rep3	35.3607	34.9442	35.1524	11.9582	9.91818	0.00103355	0.103355
	t-test							6.76954e-05
rb1 ex23-ex24		TR1	TR2	Avg	Δct (target-reference)	ΔΔct (target-control)	2^-ΔΔct
	+/+ rep1	25.2333	25.3852	25.3092	1.69009	0.0609221	0.958651
	+/+ rep2	24.8754	25.1247	25.0001	1.5598	-0.0693666	1.04926
	+/+ rep3	25.1421	25.3081	25.2251	1.63761	0.00844447	0.994164
					1.62917
	rb1off/off rep1	28.0913	27.8913	27.9913	4.88139	3.25222	0.10495
	rb1off/off rep2	28.3153	28.3541	28.3347	4.86134	3.23217	0.106419
	rb1off/off rep3	28.5995	28.7195	28.6595	5.46529	3.83612	0.0700186
	rb1off/+ rep1	25.6692	25.8513	25.7603	2.16997	0.5408	0.68739
	rb1off/+ rep2	26.7553	25.8715	26.3134	2.3636	0.734427	0.601057
	rb1off/+ rep3	25.6226	25.5573	25.59	2.28146	0.652294	0.636268
rps6kb1b	+/+ rep1	23.6183	23.62	23.6191
	+/+ rep2	23.3792	23.5013	23.4403
	+/+ rep3	23.5101	23.6649	23.5875
	rb1off/off rep1	23.1078	23.112	23.1089
	rb1off/off rep2	23.564	23.3828	23.4734
	rb1off/off rep3	23.0294	23.3591	23.1943
	rb1off/+ rep1	23.5904	23.5902	23.5902
	rb1off/+ rep2	23.9827	23.917	23.9498
	rb1off/+ rep3	23.2244	23.3926	23.3085

## Sheet: rb1-on het incross
Figure 7 - Source data. RT-qPCR of rb1 mRNA levels in progeny from rb1off/+ incross and rb1on/+ incross
Figure 7 J rb1on/+ incross RT-qPCR source data
Gene		TR1	TR2	Avg	Δct (target-reference)	ΔΔct (target-control)	2^-ΔΔct	percentage
rb1 ex6-ex8	+/+ rep1	25.6317	25.2762	25.454	1.67116	-0.0788404	1.05617	105.617
	+/+ rep2	25.427	25.259	25.343	1.67287	-0.0771348	1.05492	105.492
	+/+ rep3	25.5743	25.3791	25.4767	1.91712	0.167118	0.89062	89.062
	rb1on/on rep1	25.2743	25.3791	25.3267	2.07424	0.324245	0.798716	79.8716
	rb1on/on rep2	25.544	25.1288	25.3364	2.02665	0.276653	0.825504	82.5504
	rb1on/on rep3	25.0257	25.2685	25.1471	1.89581	0.145813	0.90387	90.387
	t-test							0.0674353
	rb1on/+ rep1	25.2884	25.3414	25.3149	1.8732	0.123202	0.918148	91.8148
	rb1on/+ rep2	25.1977	25.1289	25.1633	1.67935	-0.0706534	1.05019	105.019
	rb1on/+ rep3	25.3975	25.5582	25.4778	1.8782	0.1282	0.914972	91.4972
	t-test						0.961104	0.0959252
rb1 ex23-ex24	+/+ rep1	24.7021	24.6953	24.6987	0.91588	-0.23412	1.17619	117.619
	+/+ rep2	24.7624	24.5914	24.6769	1.00677	-0.143226	1.10437	110.437
	+/+ rep3	24.9261	25.2405	25.0833	1.52372	0.373723	0.771788	77.1788
					1.14879		1.01745
	rb1on/on rep1	24.792	24.7415	24.7667	1.51429	0.364294	0.776849	77.6849
	rb1on/on rep2	24.6993	24.7028	24.7011	1.39132	0.241319	0.845972	84.5972
	rb1on/on rep3	24.5501	24.67	24.6101	1.35878	0.208785	0.865266	86.5266
	t-test						0.829362	0.213973
	rb1on/+ rep1	24.7545	24.2104	24.4824	1.04075	-0.109249	1.07867	107.867
	rb1on/+ rep2	24.5276	24.6567	24.5922	1.10818	-0.0418214	1.02941	102.941
	rb1on/+ rep3	24.8921	24.9542	24.9232	1.32357	0.173565	0.886649	88.6649
	t-test						0.998243	0.0564881
rps6kb1b	+/+ rep1	23.7613	23.8043	23.7828
	+/+ rep2	23.4693	23.871	23.6701
	+/+ rep3	23.4082	23.7109	23.5596
	rb1on/on rep1	23.1486	23.3563	23.2525
	rb1on/on rep2	23.346	23.2735	23.3098
	rb1on/on rep3	23.2289	23.2737	23.2513
	rb1on/+ rep1	23.2646	23.6187	23.4417
	rb1on/+ rep2	23.569	23.399	23.484
	rb1on/+ rep3	23.7126	23.4866	23.5996
