# Supplementary material for: Cre/lox regulated conditional rescue and inactivation with zebrafish UFlip alleles generated by CRISPR-Cas9 targeted integration
Source: eLife. 2022 Jun 17;11:e71478. doi: 10.7554/eLife.71478 (PMC9270027; doi:10.7554/eLife.71478)
Supplement: Figure 8—source data 1. [file elife-71478-fig8-data1.xlsx]

## Sheet: rb1-off Cre injected
Figure 8 panels F and G. rb1off conditional rescue by Cre mRNA injection: quantification of pH3 cells and Cre-mediated inversion by qPCR.
Figure 8 F Quantification of pH3 positive cells in 5 dpf larvae head sections from Cre injected embryos from rb1off/+ x rb1stop/+
		pH3 counts
	rb1off/stop	Sect1	Sect2	Sect3	Total	SD	SE	p value
	Retina
	Embryo 1	127	145	134	406	12.5033	7.21901
	Embryo 2	121	147	125	393
	Embryo 3	137	118	126	381
	Avg				393.333
	Brain
	Embryo 1	42	38	43	123	21.4554	12.3876
	Embryo 2	39	35	45	119
	Embryo 3	41	61	56	158
	Avg				133.333
	rb1off/stop Cre injected
	Retina
	Embryo 1	77	61	86	224	58.1034	33.547	0.00260599
	Embryo 2	50	49	61	160			**
	Embryo 3	40	30	38	108
	Avg				164
	Brain
	Embryo 1	17	13	14	44	5.50757	3.17989	0.0022
	Embryo 2	24	12	13	49			**
	Embryo 3	7	21	10	38
	Avg				43.6667
Figure 8 G qPCR of 5' and 3' junctions in the rb1off allele after Cre mRNA injection to measure inversion efficiency
		TR1	TR2	Avg	Δct (target-reference)	ΔΔct (target-control)	2^-ΔΔct	2^-ΔΔct (%)
rb1off 5' junction
	rep1	27.7797	28.0052	27.8925	4.68084	2.1646	0.223044	22
rb1off/stop Cre injected	rep2	28.2057	27.9138	28.0597	4.98622	2.46998	0.180494	18
	rep3	28.0423	27.9328	27.9875	4.53247	2.01623	0.247203	25
								21.6667
	rep1	25.0499	25.1345	25.0922	2.20453	-0.311707	1.24118	124
rb1off/stop	rep2	25.8854	25.7221	25.8038	2.66995	0.153714	0.898933	90
	rep3	26.3511	26.2187	26.2849	2.67423	0.157993	0.896271	89
T-Test								0.00245438
								**
rb1off 3' junction
	rep1	28.4332	28.6124	28.5228	5.31117	3.78945	0.0723207	7
rb1off/stop Cre injected	rep2	29.466	29.3112	29.3886	6.3151	4.79339	0.0360618	4
	rep3	27.9443	27.6787	27.8115	4.35648	2.83476	0.140169	14
								8.33333
	rep1	24.3306	24.2539	24.2922	1.40456	-0.117155	1.08459	108
rb1off/stop	rep2	24.7698	24.594	24.6819	1.54806	0.0263379	0.98191	98
	rep3	25.3366	25.1098	25.2232	1.61254	0.090817	0.938991	94
T-Test								5.67561e-05
								****
rps6kb1b
	rep1	23.2117	23.2116	23.2116
rb1off/stop Cre injected	rep2	23.0376	23.1095	23.0735
	rep3	23.3581	23.5519	23.455
	rep1	22.9257	22.8496	22.8877
rb1off/stop	rep2	23.1476	23.1201	23.1338
	rep3	23.6617	23.5596	23.6107

## Sheet: rb1-off neurod1-2A-Cre
Figure 8 panels H and I. rb1off conditional rescue by neurod1-2A-Cre: quantification of pH3 cells and Cre-mediated inversion by qPCR.
Figure 8 H Quantification of pH3 positive cells in 5 dpf larvae head sections from rb1off/stop and neurod1-2A-Cre; rb1off/stop
		pH3 counts
	rb1off/stop	Sect1	Sect2	Sect3	Total	SD	SE	p value
	Retina
	Embryo 1	112	120	117	349	44.658	25.784
	Embryo 2	107	106	98	311
	Embryo 3	82	87	91	260
	Avg				306.667
	Brain
	Embryo 1	32	49	37	118	12.3423	7.12606
	Embryo 2	40	54	48	142
	Embryo 3	35	47	43	125
	Avg				128.333
	neurod1-2A-Cre; rb1off/stop
	Retina
	Embryo 1	62	80	88	230	37.7492	21.7951	0.03
	Embryo 2	48	52	55	155			*
	Embryo 3	67	61	72	200
	Avg				195
	Brain
	Embryo 1
	Embryo 2	13	14	12	39	12.0968	6.98431	0.001
	Embryo 3	11	17	16	44			**
	Avg	20	22	20	62
					48.3333
Figure 8 I qPCR of 5' and 3' junctions in the rb1off allele to measure efficiency of inversion by neurod1-2A-Cre
		TR1	TR2	Avg	Δct (target-reference)	ΔΔct (target-control)	2^-ΔΔct	2^-ΔΔct (%)
rb1off 5' junction
	rep1	26.7931	26.8046	26.7988	3.68483	0.995296	0.501633	50
neurod1-2A-Cre; rb1off/stop	rep2	26.8862	26.545	26.7156	3.46603	0.776497	0.583783	58
	rep3	26.3207	26.1195	26.2201	2.97022	0.280679	0.823203	82
								63.3333
	rep1	26.2497	26.2612	26.2554	2.91357	0.224035	0.856168	86
rb1off/stop	rep2	26.0458	26.0101	26.028	2.59281	-0.0967256	1.06934	107
	rep3	26.0244	25.808	25.9162	2.56223	-0.127309	1.09225	109
t-test								0.036793
								*
rb1off 3' junction
	rep1	25.14	25.1174	25.1287	2.01471	0.611765	0.654396	65
neurod1-2A-Cre; rb1off/stop	rep2	25.3545	25.3256	25.34	2.09045	0.687506	0.620927	62
	rep3	25.2279	24.9779	25.1029	1.85305	0.45011	0.731987	73
								66.6667
	rep1	24.7421	24.6611	24.7016	1.35969	-0.0432552	1.03044	103
rb1off/stop	rep2	24.9541	24.8085	24.8813	1.44611	0.0431701	0.97052	97
	rep3	24.9716	24.5424	24.757	1.40303	8.51567e-05	0.999941	100
t-test								0.00085098
								**
rps6kb1b
	rep1	23.2967	22.9312	23.114
neurod1-2A-Cre; rb1off/stop	rep2	23.2369	23.2623	23.2496
	rep3	23.1928	23.307	23.2499
	rep1	23.3884	23.2954	23.3419
rb1off/stop	rep2	23.5099	23.3605	23.4352
	rep3	23.3842	23.3238	23.354
