# Supplementary material for: Cre/lox regulated conditional rescue and inactivation with zebrafish UFlip alleles generated by CRISPR-Cas9 targeted integration
Source: eLife. 2022 Jun 17;11:e71478. doi: 10.7554/eLife.71478 (PMC9270027; doi:10.7554/eLife.71478)
Supplement: Table 2—source data 1. [file elife-71478-table2-data1.xlsx]

## Sheet: F0 UFlip injection data
	Version 2 UFlip vector with 2A-mRFP primary reporter: rbbp4 and rb1 F0 embryo injection data
	gene/orientation	F0 embryo Primary and Secondary Marker Expression	UFlip-2A-mRFP, gcry1:BFP construct
			1st injection	2nd injection
	rbbp4 gene "off"	BFP+/RFP+	7	19
		BFP-/RFP-	37	71
		%	0.16	0.204
	rb1 gene "off"	BFP+/RFP+	60
		BFP-/RFP+	7
		BFP-/RFP-	14
		%	0.74
	Original UFlip vector with mRFP primary reporter: rb1 F0 embryo injection data
	gene/orientation	F0 embryo Secondary Marker Expression	UFlip-mRFP, gcry1:BFP construct
			1st injection	2nd injection
	rb1 gene "off"	BFP+	15	19
		BFP-	19	20
		%	0.56	0.51
	rb1 gene "on"	BFP+	25	36
		BFP-	19	21
		%	0.43	0.37

## Sheet: rbbp4 F1 UFlip data
Table. rbbp4-2A-mRFP-gcry1:BFP allele germline transmission data: Version 2 UFlip vector with 2A-mRFP gene trap primary reporter
	Founder F0	BFP+/RFP+ F1 embryos	BFP-/RFP- F1 embryos	Status	5' and 3' Junction PCR
gene "off"	Male #1	6	24	Transmitting	5' and 3' Junctions by PCR. F1 fin clipped confirmed by PCR and Sequence
	Male #2	0	120	Not trans
	Male #3	0	80	Not trans
	Male #4	2	20	Transmitting	3' junction only.
	Male #5	0	150	Not trans
	Male #6	0	75	Not trans
	Male #7	0	75	Not trans
	Male #8	0	3	Not trans

## Sheet:  rb1 F1 UFlip data
Table. rb1-mRFP, gcry1:BFP allele germline transmission data
				Transmitting = secondary marker positive F1 embryos recovered.
				Not trans = Not Transmitting. At least 75 embryos screened
				Blank = <75 embryos screened
	Founder F0	BFP+ F1 embryos	BFP- F1 embryos	Status	5' and 3' Junction PCR
"off" - 1st and 2nd injections	Female #1	0	100	Not trans
	Female #2	0	95	Not trans
	Male #3	1	100	Transmitting	No Junctions by PCR
	Male #4	0	86	Not trans
	Female #5	0	65
	Male #6	0	45
	Male #7	0	75	Not trans
	Male #8	0	90	Not trans
	Female #9	0	100	Not trans
	Male #10	0	75	Not trans
	Male #11	0	80	Not trans
	Male #12	0	100	Not trans
	Male #13	0	75	Not trans
	Male #14	0	80	Not trans
	Male #15	0	100	Not trans
	Male #16	0	150	Not trans
	Male #17	0	100	Not trans
	Male #18	39	36	Transmitting	5' and 3' Junctions by PCR. F1 finclipped - 5' and 3' precise Junctions confirmed by PCR, Sequence.
	Male #19	0	65
	Male #20	0	76	Not trans
	Male #21	0	88	Not trans
	Male #22	0	90	Not trans
	Female #23	0	75	Not trans
	Male #24	0	45
	Male # 25	0	75	Not trans
	Male # 26	10	95	Transmitting	5' and 3' Junctions by PCR. F1 finclipped - confirmed by PCR, Sequence. 5' Junction contains 72 bp insertion and 5'HA duplication.
	Female # 27	0	100	Not trans
	Female #28	0	120	Not trans
	Female #29	0	89	Not trans
	Female #30	0	37
	Female #31	0	100	Not trans
	Female #32	0	75	Not trans
	Female #33	0	67
	Founder F0	BFP+ F1 embryos	BFP- F1 embryos	Status	5' and 3' Junction PCR
gene "on" - 1st injection	Female #1	0	95	Not trans
	Female #2	0	150	Not trans
	Female #3	0	98	Not trans
	Female #4	0	78	Not trans
	Female #5	0	89	Not trans
	male #6	0	110	Not trans
	male #7	0	45
	male #8	20	28	Transmitting	No Junctions by PCR
	male #9	0	79	Not trans
	male #10	0	80	Not trans
	male #11	0	90	Not trans
	male #12	5	118	Transmiting	5' Junction only, no 3' Junction
	Female #13	0	80	Not trans
	Female #14	0	90	Not trans
	Female #15	0	100	Not trans
	male #16	16	84	Transmitting	No Junctions by PCR
	female #17	0	45
	male #18	17	83	Transmitting	No Junctions by PCR
	male #19	0	100	Not trans
	male #20	0	65
	male #21	0	100	Not trans
	female #22	0	74	Not trans
	male #23	0	95	Not trans
	male #24	50	150	Transmitting	No Junctions by PCR
gene "on" - 2nd injection	male #1	0	70	Not trans
	male #2	0	55
	male #3	0	100	Not trans
	male #4	0	95	Not trans
	female #5	0	85	Not trans
	male #6	8	26	Transmiting	5' and 3' Junctions by PCR. F1 finclipped - 5' and 3' Junctions confirmed by PCR, Sequence.
	Female #7	0	68
	Female #8	0	79	Not trans
	Female #9	0	100	Not trans
	male # 10	0	85	Not trans
Table. rb1-2A-mRFP, gcry1:BFP allele germline transmission data
	Founder F0	BFP+/RFP+ F1 embryos	BFP-/RFP- F1 embryos	Status	5' and 3' Junction PCR
	Female #1	0	100	Not transmitting
	Female #2	15	58	Transmitting	precise 5' junction, no 3' junction
	Male #3	0	22
	Female #4	0	89	Not transmitting
	Male #5	0	24
	#6	0	35
	Male #7	0	2
	Male #8	0	10
	Female #9	0	43
	Male #10	0	9
	#11	0	76	Not transmitting
	Male #12	0	59
	Female #13	0	66
	Male #14	29	105	Transmitting	two alleles; one with precise 5' and 3' junctions, one with 5' homology arm duplication, 3' precise junction
	Male #15	0	20
	Male #16	0	155	Not transmitting
	Male #17	0	77	Not transmitting
	Female #18	0	75	Not transmitting
