# Supplementary figures and images for: Cre/lox regulated conditional rescue and inactivation with zebrafish UFlip alleles generated by CRISPR-Cas9 targeted integration
Source: eLife journal article supplement (doi:10.7554/elife.71478), 2022-06-17

Figure 2 rb1 intron 6 gRNA test gel

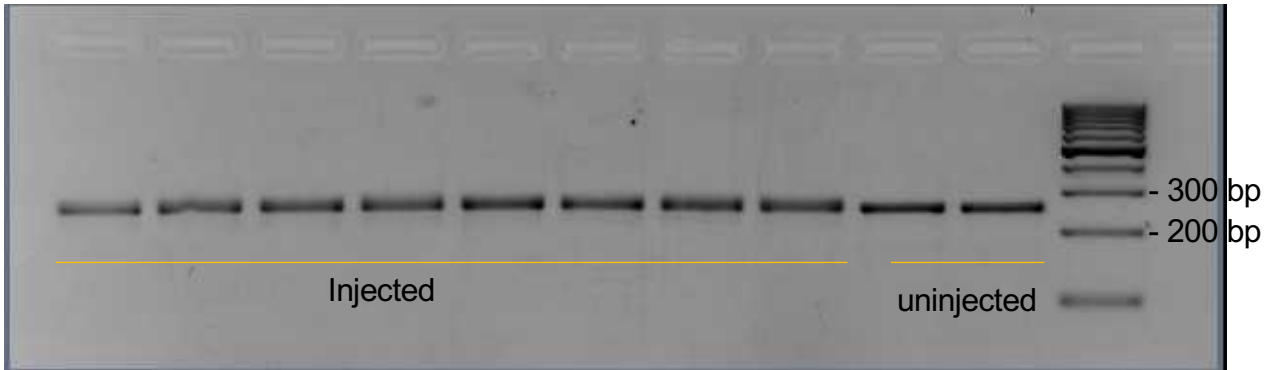

Supplement: data1 [file Figure 2 rb1 intron 6 gRNA test gel.pdf › Liu et al gel image files Source Data/Figure 2 rb1 intron 6 gRNA test gel.pdf]

Figure 9 – figure supplement 1 gels

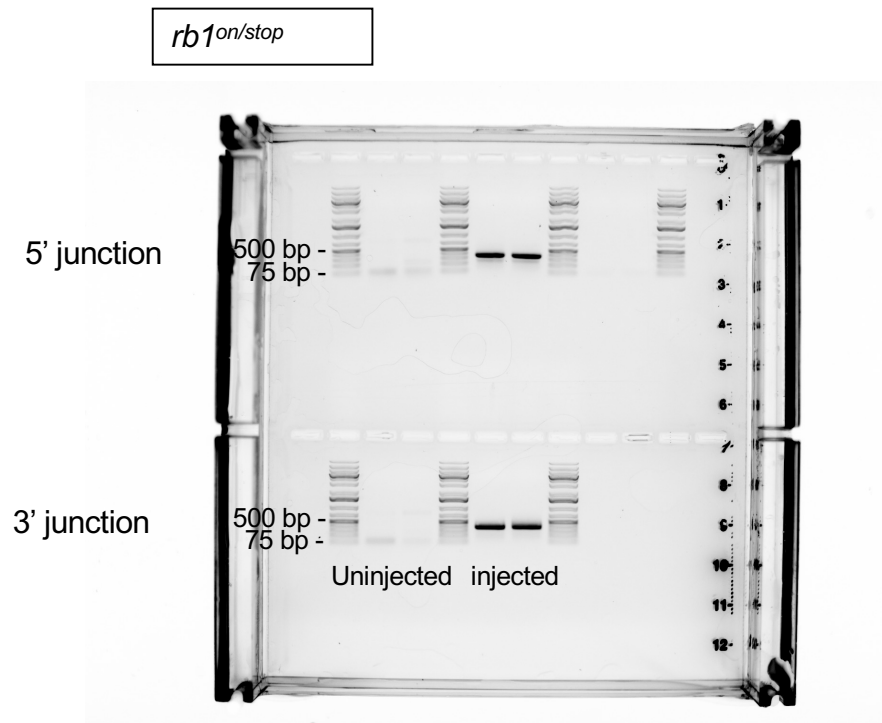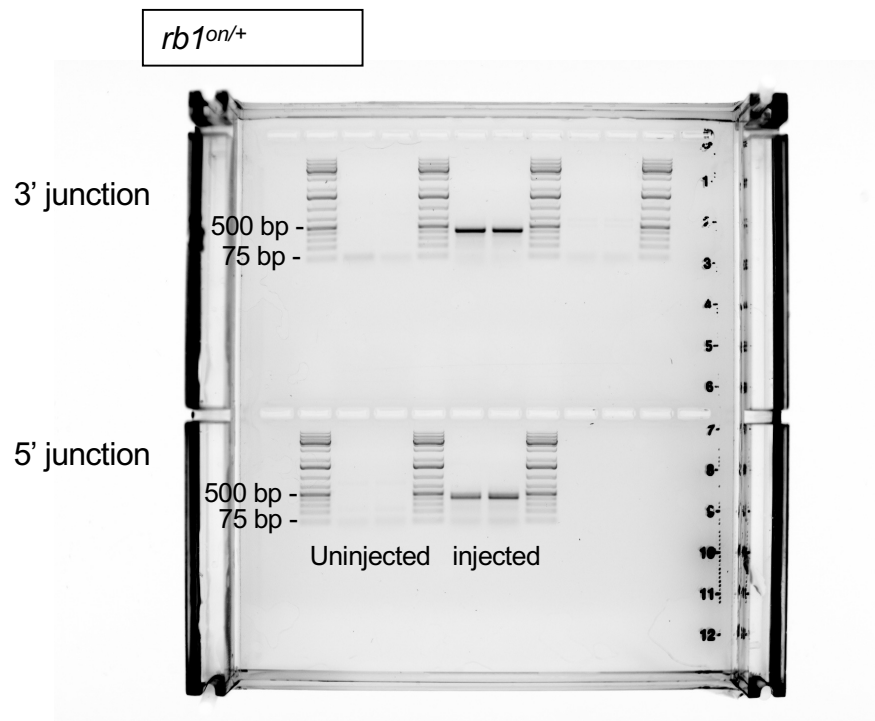

Supplement: data1 [file Figure 9 - figure supplement 1 gels.pdf › Liu et al gel image files Source Data/Figure 9 - figure supplement 1 gels.pdf]
